# Supplementary material
Source: PubMed Central journal article supplement (PMC4913487)
Supplement: Supp_Table1.pdf [file Supp_Table1.pdf]

SUPPLEMENTARY TABLE 1. SEED ROI COORDINATES

| <i>ROI</i>                          | <i>X</i> | <i>Y</i> | <i>Z</i> |      |
|-------------------------------------|----------|----------|----------|------|
| Posterior cingulate cortex          | 0        | -53      | 26       | MNI  |
| Lateral parietal cortex—L           | -48      | -62      | 36       | MNI  |
| R                                   | 46       | -62      | 32       | MNI  |
| Medial prefrontal cortex            | 0        | 52       | 6        | MNI  |
| Hippocampal formation—L             | -24      | -22      | -20      | MNI  |
| R                                   | 24       | -20      | -22      | MNI  |
| Pregenuar anterior cingulate cortex | 0        | 47       | 9        | MNI  |
| Dorsal anterior cingulate cortex    | 3        | 21       | 24       | MNI  |
| Anterior insula—L                   | -34      | 14       | 2        | TLRC |
| R                                   | 36       | 16       | 2        | TLRC |

ROIs, regions of interest.
