# Supplementary material
Source: PubMed Central journal article supplement (PMC4913487)

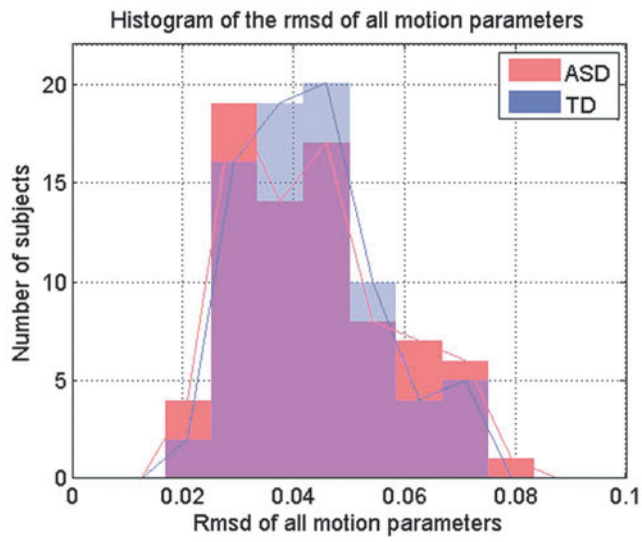

**SUPPLEMENTARY FIG. S3.** Histogram of the rmsd of all motion parameters.

Supplement: Supp_Figure3.pdf [file Supp_Figure3.pdf]
